# Supplementary material
Source: MDPI journal article supplement (https://www.mdpi.com/2073-4441/12/2/464)
Supplement: s1 [file s1]

## Sheet: Glacial inventory 2016
Id	Name	Longitude (°)	Latitude (°)	Elevation (m)	Dam type	Lake length (m)	Lake width (m)	Area (km2)	Lake Volume ×106(m3)	Distance to glacier (m)	Dam width (m)	Estimated freeboard (°)	Distance to nearest settlement (m)	Slope of Channel (°)	Potential imapct factor	Qmax (m3)	Qflood (m3)	Qdebris (m3)	Flood or Debris flow	Probablity of Outburst	Flow magnitude	Hazard
1	Qiezelaco	86.259	28.3739	5532	moraine	906	306	0.255164	5.02065	79	53	0	14671	8.9	ice/snow avalanche	10041.3	1967.43		flood	High	High	Very High
2	Youmojiaco	86.2255	28.3468	5337	moraine	1510	410	0.547667	15.4096	0	73	1	18996	7.1	IGA	30819.2	4881.42		flood	Medium	High	High
3	Cawuqudenco	86.1918	28.3353	5423	moraine	1411	451	0.549521	15.4862	202	20	0	13036	16	IGA	30972.5	6665.86		flood	High	High	Very High
4		86.1816	28.3492	5351	moraine	127	100	0.0176648	0.0995307	null	25	1	11642	19.3	UPL	199.061	46.7664		flood	Medium	Low	Low
5		86.1792	28.3507	5363	moraine	254	112	0.0200931	0.120252	null	24	1	11634	19.3	UPL	240.503	56.5323		flood	Medium	Low	Low
6	Gangpuco	86.1586	28.3209	5543	moraine	781	394	0.222234	4.09873	388	117	1	8868	8.5	IGA	8197.46	2355.21		flood	Medium	High	High
7	Paquco	86.1574	28.3035	5307	moraine	2100	325	0.579213	16.7303	316	34	0	11471	9.8	IGA	33460.6	7950.39		flood	High	High	Very High
8	Southhu	86.151	28.2953	5343	moraine	883	206	0.165553	2.66007	206	54	1	11920	9.2	IGA	5320.14	1227.46		flood	Medium	High	High
9	Taracuo	86.1313	28.294	5257	moraine	1042	295	0.231364	4.34834	619	58	1	10649	10	IGA	8696.68	2185.79		flood	Medium	High	High
10	Tuzhuocuo	86.1031	28.2531	5201	moraine	680	300	0.147966	2.25567	460	54	1	8747	12.9	ICA	4511.34	1308.88	3272.2	debris flow	Low	High	High
11		86.1273	28.2701	5547	moraine	147	123	0.017275	0.0963223	162	69	1	13396	10	IGA	192.645	40.5813		flood	Medium	Low	Low
12		86.1268	28.2687	5541	moraine	180	99	0.0169144	0.0933852	null	31	1	13286	10	UPL	186.77	39.6005		flood	Medium	Low	Low
13		86.1298	28.2666	5513	moraine	190	83	0.0112681	0.0514353	null	21	1	13385	10	null	102.871	21.6841		flood	Low	Low	Low
14		86.1031	28.2727	5498	moraine	154	66	0.0110695	0.0501095	560	25.5	1	8730	15.1	GD	100.219	29.1168	72.7921	debris flow	Medium	Low	Medium
15		86.088	28.2468	5591	moraine	135	123	0.0154331	0.0816267	null	35	1	7295	20.7	null	163.253	53.6919		flood	Low	Low	Low
16		86.0867	28.2216	5178	moraine	564	230	0.0923947	1.12976	1077	51	1	7555	15.5	IGA、D	2259.53	725.769	1814.42	debris flow	High	High	Very High
17		86.0579	28.2094	4948	moraine	243	169	0.030727	0.224364	null	25	0	6192	17.5	null	448.728	164.247	410.618	debris flow	Medium	Medium	Medium
18		86.0601	28.1702	5194	moraine	304	206	0.0495338	0.452326	260	50	0	9960	18.9	IGA	904.651	238.946	597.364	debris flow	High	High	Very High
19		86.0673	28.1633	5183	moraine	220	96	0.0190863	0.11151	863	30	1	10064	18.5	GD	223.019	58.4569	146.142	debris flow	Medium	Low	Medium
20		86.0759	28.1601	5237	bedrock	159	110	0.0124102	0.0592687	null	40	1	10602	18	null	118.537	29.8915	74.7287	debris flow	Low	Low	Low
21		86.0509	28.1249	4560	moraine	272	140	0.0231796	0.148325	4156	35	1	10023	15.2	GD	296.65	77.991	194.978	debris flow	Medium	Low	Medium
22	Cirenmaco	86.0663	28.0671	4633	moraine	1314	366	0.342393	7.73164	0	200	0	7293	19.8	IGA	15463.3	5086.6	12716.5	debris flow	High	High	Very High
23		86.0274	28.0691	4486	bedrock	321	158	0.0325136	0.243778	null	30	1	3217	36.9	R	487.555	256.627	641.567	debris flow	Medium	High	High
24		86.0729	28.0326	4962	moraine	176	141	0.0242297	0.158295	0	100	0	11439	17.5	IGA	316.589	75.3835	188.459	debris flow	High	Low	Medium
25		86.0348	28.0091	4415	bedrock	204	113	0.0206308	0.125007	null	24	1	8303	19.8	R	250.013	75.2481		flood	Medium	Low	Low
26	Emaco	86.033	27.9946	4262	bedrock	314	114	0.0232935	0.149395	null	30	1	10061	23.5	R	298.791	78.3351	195.838	debris flow	Medium	Low	Medium
27		86.0475	27.9968	4351	bedrock	202	118	0.020427	0.123197	null	99	1	10674	21.8	null	246.394	61.819	154.547	debris flow	Low	Low	Low
28		85.8561	28.413	5569	moraine	325	140	0.0251789	0.167483	300	32	0	13734	8.5	IGA	334.966	69.1838		flood	High	Low	Medium
29		85.8559	28.3894	5427	ice	337	102	0.0454545	0.398701	387	45	1	12993	13.5	IGA	797.402	172.061		flood	Medium	Low	Low
30		86.0736	28.0374	4865	moraine	158	63	0.00741937	0.0278476	469	43	0	10513	17.5	null	55.6952	14.1333	35.3333	debris flow	Low	Low	Low
31		85.8849	28.3903	5422	moraine	223	76	0.0111682	0.0507673	null	30	1	10708	12.2	null	101.535	25.4138		flood	Low	Low	Low
32	Yinreco	85.8907	28.3709	5245	moraine	786	579	0.276101	5.637	null	90	1	10429	8.2	null	11274	2878.07		flood	Low	High	High
33		85.8904	28.3689	5244	moraine	180	112	0.0156752	0.0835136	null	74	1	10429	8.2	null	167.027	42.6394		flood	Low	Low	Low
34	Gangxico	85.8705	28.36	5212	moraine	5045	1215	4.52415	342.179	0	230	0	10577	8.2	IGA	684358	172879		flood	High	High	Very High
35		85.902	28.3601	5162	moraine	214	87	0.0158455	0.0848499	null	10	1	10010	8.2	null	169.7	44.6579		flood	Low	Low	Low
36	Cuoqiongniba	85.91	28.3538	5226	moraine	245	65	0.0162113	0.0877411	null	27	1	9692	8.4	null	175.482	47.2864		flood	Low	Low	Low
37		85.9147	28.3568	5194	moraine	107	94	0.0117246	0.0545235	null	50	1	9027	8.4	null	109.047	30.935		flood	Low	Low	Low
38		85.8789	28.3411	5169	moraine	175	95	0.0140639	0.0712184	null	30	1	24028	9.2	null	142.437	18.4477		flood	Low	Low	Low
39		85.9036	28.3196	5445	moraine	345	239	0.0504383	0.464506	279	30	0	13481	8.8	IGA	929.012	194.724		flood	Medium	Low	Low
40	Mabiya	85.9077	28.3234	5384	moraine	494	428	0.142262	2.12916	500	203	0	12782	8.8	IGA	4258.32	930.701		flood	Medium	High	High
41		85.9132	28.3336	5330	moraine	178	167	0.0213115	0.131109	null	45	1	12012	8.6	UPL	262.218	60.1418		flood	Medium	Low	Low
42		85.9245	28.3229	5345	moraine	485	202	0.0808545	0.928773	304	75	1	9599	9.8	IGA	1857.55	504.078		flood	Medium	High	High
43	Mulaco	85.9302	28.3213	5306	moraine	639	247	0.106427	1.39043	50	50	1	9512	9.8	IGA	2780.86	759.652		flood	Medium	High	High
44	Xiahu	85.9488	28.3141	5232	moraine	990	705	0.307497	6.60273	152	73	1	10510	8.2	IGA	13205.5	3351.76		flood	Medium	High	High
45		85.9651	28.3143	5153	moraine	436	198	0.0510987	0.473463	null	34	0	8880	8.5	IGA、D	946.925	271.799		flood	High	Medium	Medium
46		85.9267	28.2875	5135	moraine	255	186	0.0363206	0.286814	2990	50	0	9625	12	GD	573.628	155.358		flood	Medium	Low	Low
47		85.9299	28.2858	5127	moraine	245	58	0.0124282	0.0593947	null	25	1	9585	12.6	null	118.789	32.2699		flood	Low	Low	Low
48		85.9339	28.2815	5113	moraine	166	93	0.0125529	0.0602721	null	68	1	9485	12.6	null	120.544	32.9974		flood	Low	Low	Low
49		85.926	28.2769	5296	moraine	162	117	0.0113997	0.0523198	null	45	1	10215	12.2	null	104.64	27.1274		flood	Low	Low	Low
50		85.9315	28.2721	5316	moraine	336	127	0.0426202	0.362737	null	75	1	9503	12.4	null	725.475	198.316		flood	Low	Low	Low
51	Cuonongjue	85.9153	28.2595	5095	moraine	1238	251	0.228699	4.27498	null	59	1	9413	12.9	null	8549.97	2353.41		flood	Low	High	High
52	Cuona	85.9223	28.2421	5170	moraine	143	82	0.010038	0.0434055	null	23	1	8725	12.8	null	86.8111	25.2317		flood	Low	Low	Low
53	Cuogangbu	85.9221	28.2351	5330	bedrock	152	80	0.0103528	0.045419	null	62	1	8964	12	R	90.838	25.8989		flood	Medium	Low	Low
54		85.8712	28.3096	5297	moraine	306	150	0.0177546	0.100274	null	46	1	21870	8.1	R	200.549	28.1769		flood	Medium	Low	Low
55		85.8756	28.3018	5280	moraine	192	105	0.0146782	0.0758324	null	60	1	20009	8.4	null	151.665	22.9902		flood	Low	Low	Low
56		85.8705	28.2776	5208	moraine	160	124	0.0123041	0.0585261	null	50	1	18376	8.8	R	117.052	19.0635	47.6586	debris flow	Medium	Low	Medium
57		85.8975	28.2683	5250	moraine	429	143	0.0382865	0.309895	null	70	1	16912	8.5	L	619.789	108.154	270.384	debris flow	Medium	Medium	Medium
58		85.8783	28.261	5229	moraine	277	130	0.0243131	0.159095	null	48.8	0	15943	8.5	null	318.191	58.2812	145.703	debris flow	Low	Low	Low
59		85.883	28.2471	5104	moraine	194	66	0.0101535	0.0441408	null	45	1	14258	8.2	L	88.2815	17.6979	44.2447	debris flow	Medium	Low	Medium
60		85.8798	28.2404	5195	bedrock	198	143	0.0154605	0.08184	null	74	1	12517	8.3	null	163.68	36.3632	90.9079	debris flow	Low	Low	Low
61	Galongco	85.8381	28.3223	5077	moraine	4062	1380	5.29006	430.512	0	65	0	17545	8.8	IGA	861023	145746	364365	debris flow	High	High	Very High
62		85.8192	28.2973	5093	moraine	950	390	0.269026	5.42619	0	60	0	17602	8.8	IGA	10852.4	1832.05	4580.12	debris flow	High	High	Very High
63		85.8306	28.2936	5013	moraine	837	493	0.260845	5.18565	null	89	1	16323	8.8	UPL	10371.3	1863.37	4658.43	debris flow	Medium	High	High
64		85.8273	28.2861	5050	moraine	387	283	0.0595368	0.592578	898	55	1	17164	8.8	R	1185.16	204.298	510.745	debris flow	Medium	High	High
65		85.8385	28.2854	4967	moraine	453	219	0.0467937	0.416067	null	23	1	15783	8.4	UPL	832.135	153.677	384.193	debris flow	Medium	Medium	Medium
66		85.8368	28.2589	4992	moraine	192	116	0.0173799	0.097183	null	124	1	13172	8.1	R	194.366	41.4915	103.729	debris flow	Medium	Low	Medium
67		85.7707	28.3141	5615	moraine	253	79	0.0187178	0.108363	580	58	1	20212	10	IGA	216.726	32.5722	81.4306	debris flow	Medium	Low	Medium
68		85.7709	28.3096	5605	moraine	251	148	0.0261131	0.176685	1060	75	1	19716	10.1	null	353.37	54.2398	135.599	debris flow	Low	Low	Low
69		85.7667	28.3055	5564	moraine	239	90	0.0182315	0.104254	null	30	1	19167	10.1	IGA	208.509	32.7772	81.943	debris flow	Medium	Low	Medium
70		85.7837	28.2877	5418	moraine	508	174	0.0542061	0.516334	261	60	0	24894	10.2	IGA	1032.67	129.677	324.194	debris flow	High	Medium	High
71		85.7506	28.2794	5288	moraine	215	282	0.0260921	0.176477	954	35	1	16829	8.9	R	352.954	61.8414	154.604	debris flow	Medium	Low	Medium
72		85.7829	28.2717	5309	moraine	628	200	0.0654731	0.681323	1890	60	0	22966	9.6	IGA	1362.65	183.545	458.862	debris flow	High	Medium	High
73		85.7984	28.2751	5394	moraine	296	147	0.0138213	0.0694221	495	57	0	23689	9.4	IGA	138.844	18.206	45.515	debris flow	Medium	Low	Medium
74		85.8062	28.27	5385	moraine	224	96	0.0134258	0.0665244	570	37	1	23647	9.4	IGA、R	133.049	17.473	43.6824	debris flow	Medium	Low	Medium
75		85.7968	28.265	5286	moraine	439	125	0.0397323	0.327228	null	62	1	22479	9.4	UPL	654.456	89.8012	224.503	debris flow	Medium	Medium	Medium
76		85.7838	28.2565	5031	ice	230	78	0.0174613	0.0978517	2860	102	1	21902	9.3	null	195.703	27.4616	68.6541	debris flow	Low	Low	Low
77		85.8168	28.2441	5070	moraine	311	110	0.0258696	0.174272	null	33	1	16291	9.2	GD	348.544	62.7224	156.806	debris flow	Medium	Low	Medium
78		85.8178	28.2392	5015	moraine	261	171	0.0330253	0.249431	null	60	1	15755	9.3	null	498.862	92.2623	230.656	debris flow	Low	Medium	Medium
79		85.8044	28.2237	4781	moraine	427	163	0.0407287	0.339347	650	20	1	17839	9.3	R	678.695	113.306	283.265	debris flow	Medium	Medium	Medium
80	Jialongco	85.8473	28.2109	4380	moraine	1395	503	0.626979	18.7946	0	54	0	12546	8.5	IGA	37589.3	8335.82	20839.5	debris flow	High	High	Very High
81	Nongjue	85.8713	28.1946	4628	moraine	416	191	0.0727706	0.795679	300	37	0	10736	8.8	IGA、R	1591.36	397.534	993.835	debris flow	High	High	Very High
82		85.8793	28.1931	4638	moraine	433	90	0.0333953	0.253545	null	51	1	9593	8.8	null	507.089	137.67	344.176	debris flow	Low	Medium	Medium
83		85.8659	28.1682	4712	moraine	336	119	0.0367074	0.29131	530	45	0	13136	8	IGA	582.619	124.64	311.601	debris flow	High	Medium	High
84	Daroco	85.9228	28.1817	4366	bedrock	773	1064	0.475379	12.5177	null	87	1	4587	11.9	null	25035.5	10965.7	27414.2	debris flow	Low	High	High
85		85.9075	28.1523	4486	ice	1330	194	0.20383	3.61016	1568	55	1	6882	11.9	IGA	7220.32	2468.45		flood	Medium	High	High
86		85.9193	28.1385	4871	moraine	405	267	0.0915512	1.11465	0	90	1	9785	14.2	IGA	2229.3	596.539		flood	Medium	High	High
87		85.9359	28.0614	4660	bedrock	220	102	0.0160542	0.0864957	null	84	1	8805	9.4	R	172.991	49.9551	124.888	debris flow	Medium	Low	Medium
88		85.9441	28.0664	4524	bedrock	347	213	0.056298	0.545854	null	70	1	6412	45.7	null	1091.71	390.794	976.985	debris flow	Low	High	High
89	Bhairab Kunda	85.8789	27.9897	4102	bedrock	358	225	0.0550158	0.527698	null	62	1	8842	11.4	null	1055.4	303.861	759.652	debris flow	Low	High	High
90		85.838	28.0613	4630	bedrock	327	122	0.0294654	0.210969	null	31	1	24073	11.2	null	421.938	54.5583	136.396	debris flow	Low	Low	Low
91		85.8366	28.0536	4380	bedrock	294	80	0.0219746	0.137142	null	24	1	23410	11.4	R	274.284	36.3374	90.8435	debris flow	Medium	Low	Medium
92		85.848	28.0499	4253	bedrock	142	69	0.0121392	0.0573776	null	50	1	22435	10.6	null	114.755	15.7728	39.4319	debris flow	Low	Low	Low
93		85.8402	28.0456	4490	bedrock	198	119	0.02286	0.145331	null	29	1	22569	8.9	R	290.663	39.746	99.3651	debris flow	Medium	Low	Medium
94		85.8789	28.0339	4235	bedrock	284	77	0.0194311	0.11448	null	27	1	20396	8.7	null	228.96	34.1467	85.3668	debris flow	Low	Low	Low
95		85.8822	28.0325	4238	bedrock	141	44	0.0118613	0.0554598	null	45	1	21554	8.7	R	110.92	15.7801	39.4502	debris flow	Medium	Low	Medium
96		85.8693	28.0199	4189	bedrock	180	87	0.0123473	0.0588276	null	38	1	18775	8.5	null	117.655	18.8196	47.0489	debris flow	Low	Low	Low
97		85.8696	28.0176	4170	bedrock	248	71	0.0148835	0.0773944	null	35	1	18998	8.5	null	154.789	24.5147	61.2867	debris flow	Low	Low	Low
98		85.8269	28.1387	4750	moraine	175	128	0.0265686	0.181229	null	45	0	36500	14.2	IGA	362.459	32.3341	80.8353	debris flow	High	Low	Medium
99		85.8368	28.1292	4465	moraine	198	127	0.0167695	0.0922127	659	60	0	35441	12.5	IGA	184.425	16.8987	42.2468	debris flow	High	Low	Medium
100		85.8151	28.0791	4259	bedrock	285	131	0.033465	0.254322	null	24	1	30855	11.8	null	508.644	52.8144	132.036	debris flow	Low	Low	Low
101		85.8146	28.0618	4335	bedrock	278	55	0.0133258	0.0657986	null	52	0	21853	10.4	null	131.597	18.5016	46.2541	debris flow	Medium	Low	Medium
102		85.8251	28.0514	4250	bedrock	457	177	0.0721205	0.785264	null	56	1	23193	10.7	null	1570.53	209.752	524.379	debris flow	Low	High	High
103	Gongco	85.8692	28.3293	5113	bedrock	2589	1264	2.08946	110.061	null	123	1	23621	8.1	null	220122	28935.7		flood	Low	High	High
104		86.102	28.2587	5204	moraine	221	77	0.0117806	0.0549063	null	43	1	87821	15.2	R	109.813	4.29537	10.7384	debris flow	Medium	Low	Medium
105		86.1857	28.3451	5410	moraine	116	35	0.0116856	0.0542574	null	20	0	12376	14.5	UPL	108.515	24.3207		flood	Medium	Low	Low
106		86.1168	28.2538	5307	moraine	140	70	0.00892559	0.0365299	null	48	1	11548	15.2	UPL	73.0597	17.2709		flood	Medium	Low	Low
107		85.7876	28.2539	5013	ice	213	105	0.0195618	0.115612	null	43	1	21247	9.3	null	231.224	33.3022	83.2554	debris flow	Low	Low	Low
108		85.7658	28.2414	5131	ice	238	196	0.0153804	0.0812184	null	84	1	21932	8.2	null	162.437	22.7667	56.9169	debris flow	Low	Low	Low
109		85.7658	28.2414	5131	ice	238	196	0.0170782	0.0947156	null	84	1	21942	8.2	null	189.431	26.5398		flood	Low	Low	Low
110		85.7884	28.1368	4585	moraine	245	160	0.03749	0.300475	311	93	1	33101	14.9	IGA	600.949	58.5776	146.444	debris flow	Low	Low	Low
111		85.7506	28.2794	5213	ice	245	160	0.0102137	0.0445259	240	34	0	16289	8.9	null	89.0518	16.027	40.0675	debris flow	Low	Low	Low
112		85.7815	28.2592	5031	ice	209	65	0.0130735	0.0639773	null	42	1	22431	9.3	null	127.955	17.5897	43.9743	debris flow	Low	Low	Low
113		85.7751	28.2376	5094	ice	148	68	0.00953694	0.0402619	null	36	1	21179	9.3	null	80.5237	11.6293	29.0733	debris flow	Low	Low	Low
114		85.872	28.2676	5307	bedrock	168	87	0.0108273	0.0485078	null	65	1	16885	9.3	null	97.0156	16.9516	42.3791	debris flow	Low	Low	Low
115		85.8582	28.3881	5415	moraine	119	160	0.00801005	0.0311627	null	52	1	13012	9.3	R	62.3255	13.433		flood	Low	Low	Low
116		85.8631	28.3854	5504	bedrock	210	78	0.0144527	0.0741276	null	27.5	1	13220	9.3	null	148.255	31.5578		flood	Low	Low	Low
117		85.8385	28.3911	5584	ice	65	34	0.00748209	0.028194	null	32	1	14508	9.3	null	56.3879	11.1479		flood	Low	Low	Low
118		85.7589	28.3084	5469	ice	193	42	0.0103338	0.0452966	null	28	1	19311	8.9	null	90.5933	14.1515	35.3787	debris flow	Low	Low	Low
119		85.8904	28.17	4425	moraine	334	71	0.0234073	0.150469	1541	40	0	10315	8.8	null	300.938	77.4552	193.638	debris flow	Medium	Low	Medium
120		85.911	28.3657	5108	ice	161	77	0.00979169	0.0418508	null	39	0	7530	8.2	null	83.7016	26.9458	67.3645	debris flow	Low	Low	Low
121		85.8657	28.3985	5417	ice	120	104	0.00958111	0.040536	null	34	1	11715	9.3	null	81.072	18.9557		flood	Low	Low	Low
122		85.7876	28.2539	5008	moraine	103	67	0.00946238	0.0398006	null	44	0	21246	9.3	null	79.6012	11.4651		flood	Low	Low	Low
